# Supplementary material for: Evaluating four gap-filling methods for eddy covariance measurements of evapotranspiration over hilly crop fields
Source: Copernicus journal article supplement (doi:10.5194/gi-2017-44), 2017-12-01
Supplement: Supplementary file 1 [file gi-2017-44-supplement.pdf]

**1 Supplementary Materials: list of Figures**

2

3 **Field B**

GV

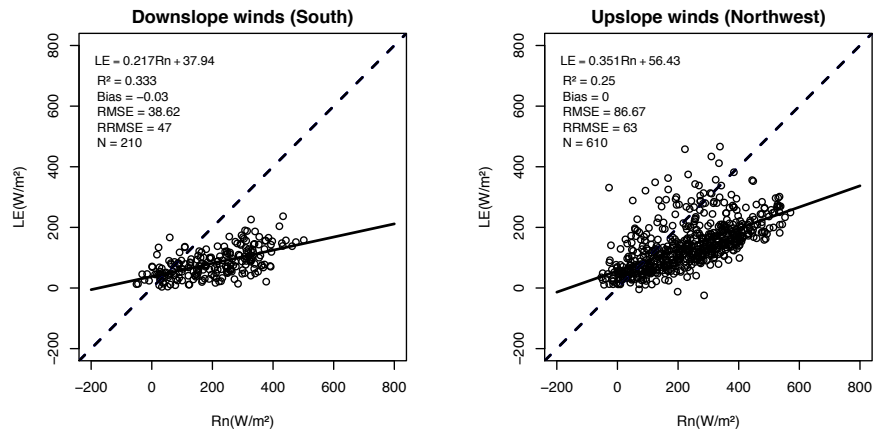

4

5

6

7

8

9

10

11

12

13

14

15

16 Figure SP1a. Calibration of the LE - Rn gap-filling method on field B. Columns 1 and 2 correspond to  
17 downslope and upslope winds, respectively. Line 1 corresponds to the period with green vegetation  
18 (GV). The dashed line is the 1:1 line, and the continuous line is the regression line.  $R^2$  is coefficient of  
19 determination. RMSE and RRMSE are absolute and relative root mean square errors, respectively. N  
20 is the number of flux data calculated over 30 min intervals.

21

GV

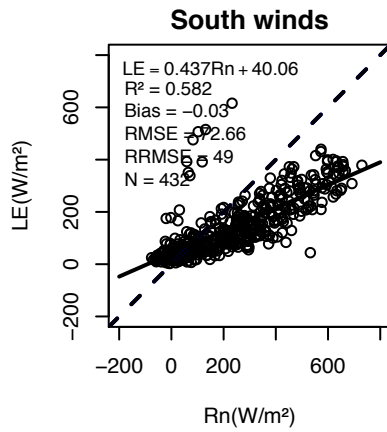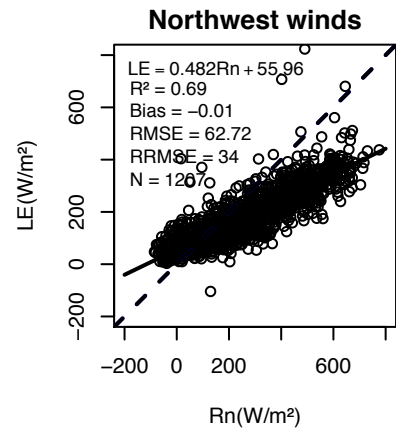

PS

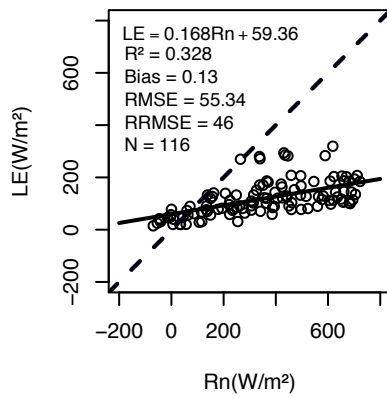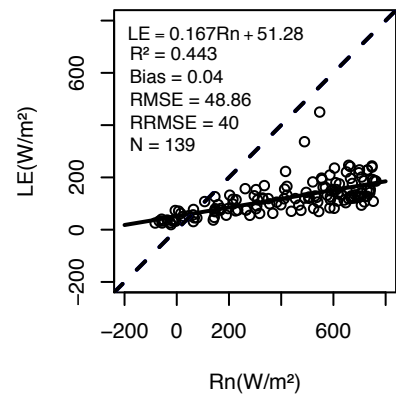

SV

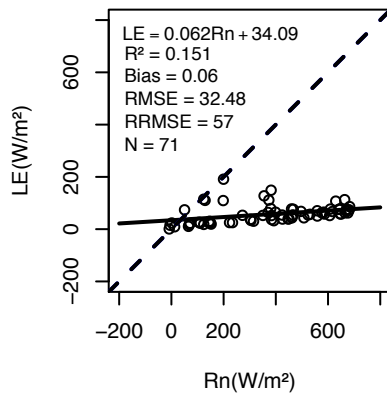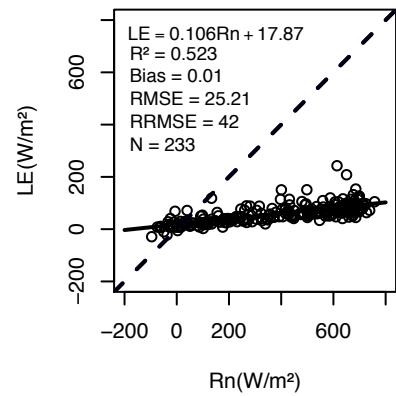

23

24 Figure SP1b. Calibration of the LE - Rn gap-filling method on field C. Columns 1 and 2 correspond to  
 25 south and northwest winds, respectively. Lines 1, 2 and 3 correspond to the three periods (GV, PS,  
 26 SV) that differed in vegetation phenology, soil water content and climatic conditions. The dashed line  
 27 is the 1:1 line, and the continuous line is the regression line.  $R^2$  is coefficient of determination. RMSE  
 28 and RRMSE are absolute and relative root mean square errors, respectively. N is the number of flux  
 29 data calculated over 30 min intervals.

30

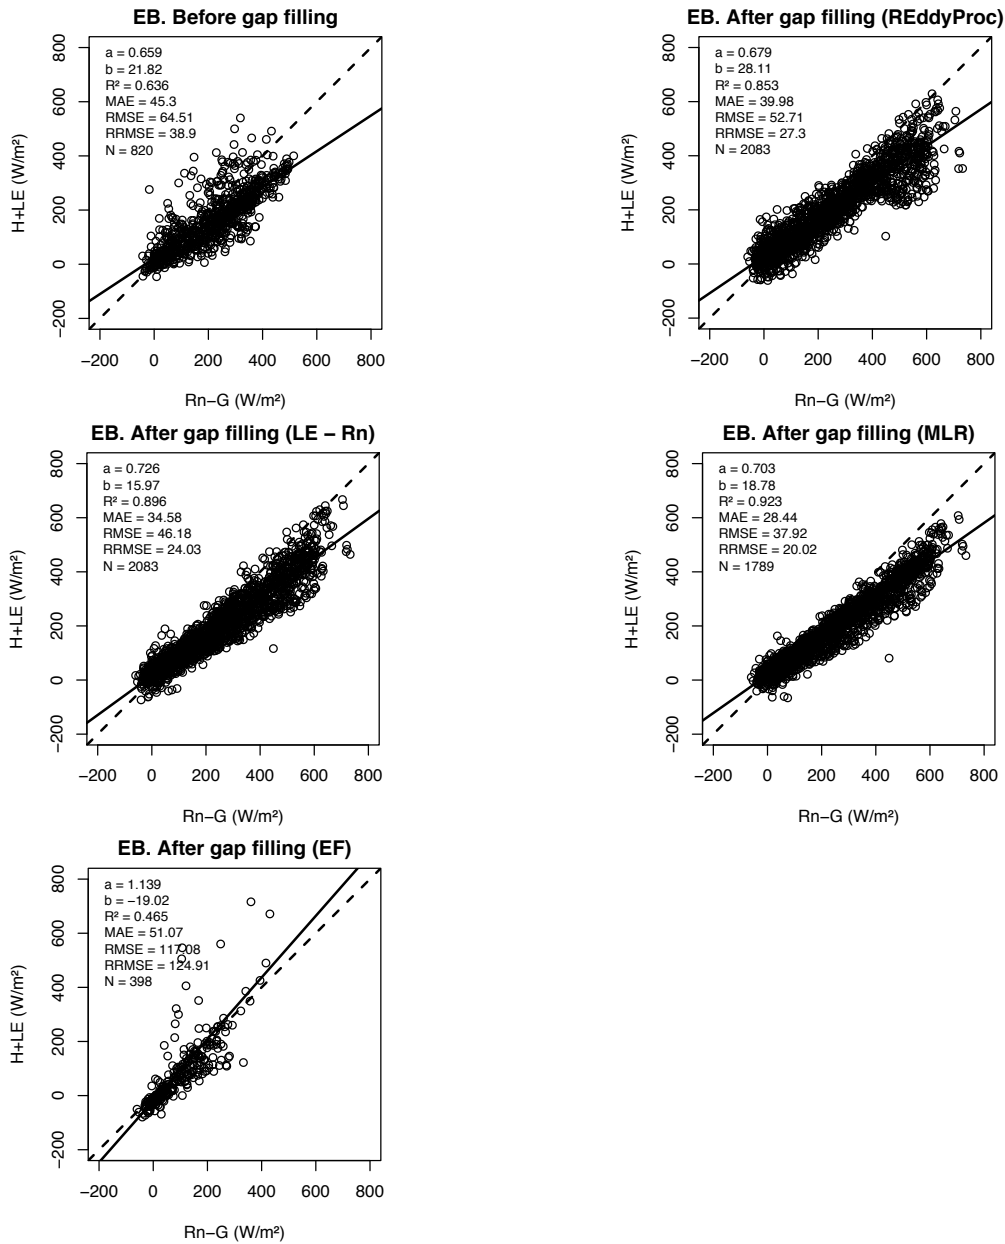

32

33 Figure SP2a. Energy balance closure (EB) for field B. Flux data are calculated over 30 minutes  
 34 intervals. Statistical indicators correspond to the comparison of convective energy ( $H + LE$ ) on y-axis  
 35 against the available energy ( $Rn - G$ ) on x-axis, before (top left subplot) and after (other subplots)  
 36 reconstruction of LE data by the four gap-filling methods. The dashed line is the 1:1 line, and the  
 37 continuous line is the regression line. Terms  $a$  and  $b$  are the slope and the intercept of the linear  
 38 regression, respectively.  $R^2$  is coefficient of determination. MAE is the mean absolute error. RMSE  
 39 and RRMSE are absolute and relative root mean square errors, respectively.  $N$  is the number of 30 min  
 40 intervals data.

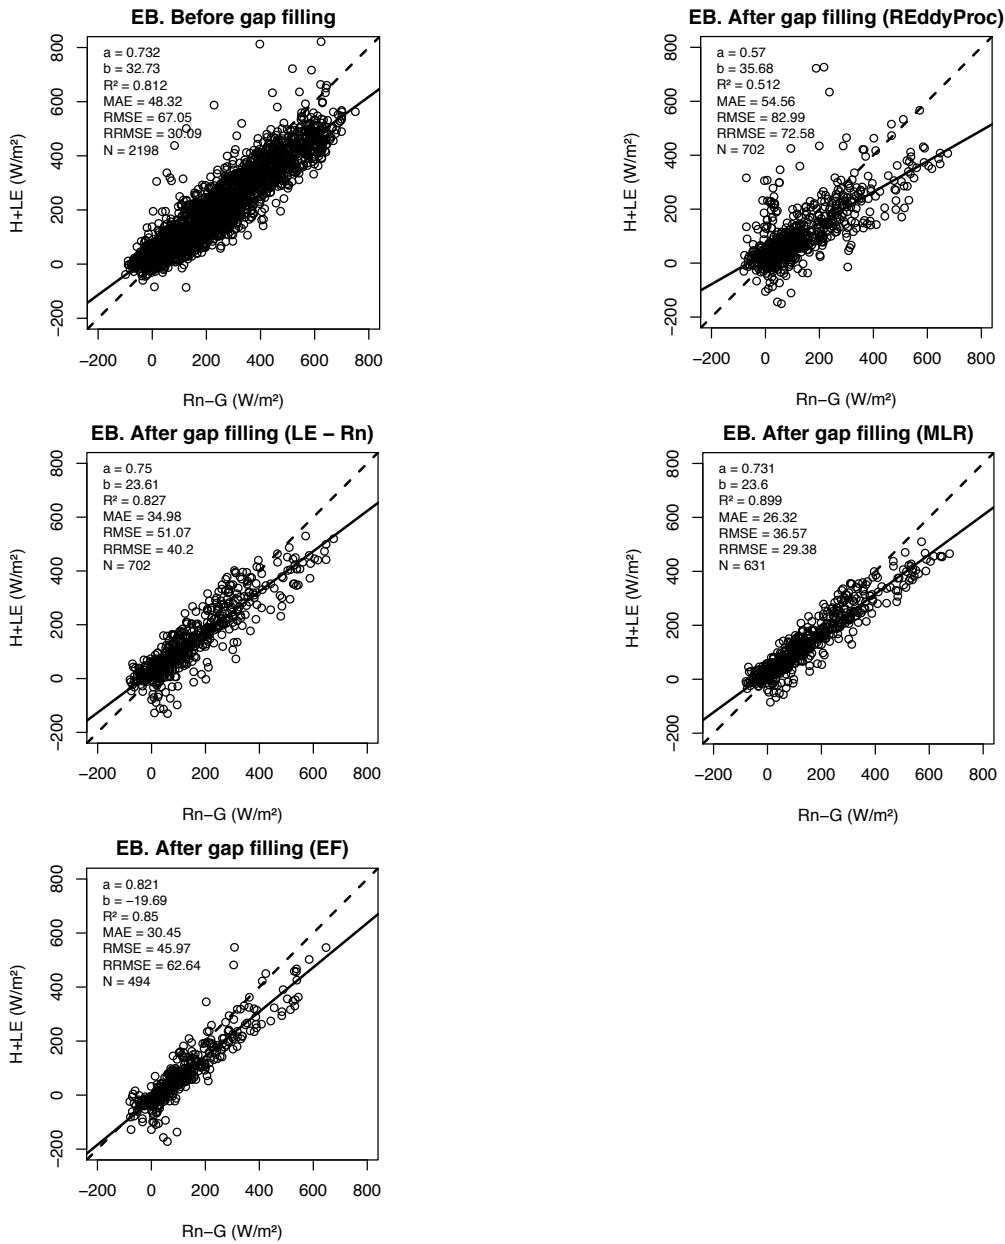

42

43 Figure SP2b. Energy balance closure (EB) for field C. Flux data are calculated over 30 minutes  
 44 intervals. Statistical indicators correspond to the comparison of convective energy (H + LE) on y-axis  
 45 against the available energy (Rn - G) on x-axis, before (top left subplot) and after (others subplots)  
 46 reconstruction of LE data by the four gap-filling methods. The dashed line is the 1:1 line, and the  
 47 continuous line is the regression line. Terms a and b are the slope and the intercept of the linear  
 48 regression, respectively.  $R^2$  is coefficient of determination. MAE is the mean absolute error. RMSE  
 49 and RRMSE are absolute and relative root mean square errors, respectively. N is the number of 30 min  
 50 intervals data.

51 **Supplementary Materials: list of tables**

52

53

54 Table SP1. Covariance analysis on regression coefficients for the LE - Rn method when  
55 discriminating between the two main winds directions.

56

| Field | Period | Test of equal slopes | Test of equal intercepts |
|-------|--------|----------------------|--------------------------|
| A     | GV     | **                   | *                        |
|       | PS     |                      | **                       |
|       | SV     |                      |                          |
| B     | GV     | ***                  |                          |
| C     | GV     |                      | **                       |
|       | PS     |                      |                          |
|       | SV     | *                    | *                        |

Signification codes

\*\*\*  $\leq 0.001$

$0.001 < ** \leq 0.01$

$0.01 < * \leq 0.05$

57

58

59

60

61

62

63

64

65

66

67

68

69
